# Supplementary material
Source: PubMed Central journal article supplement (PMC5669557)
Supplement: jci-127-90229-s001.pdf [file jci-127-90229-s001.pdf]

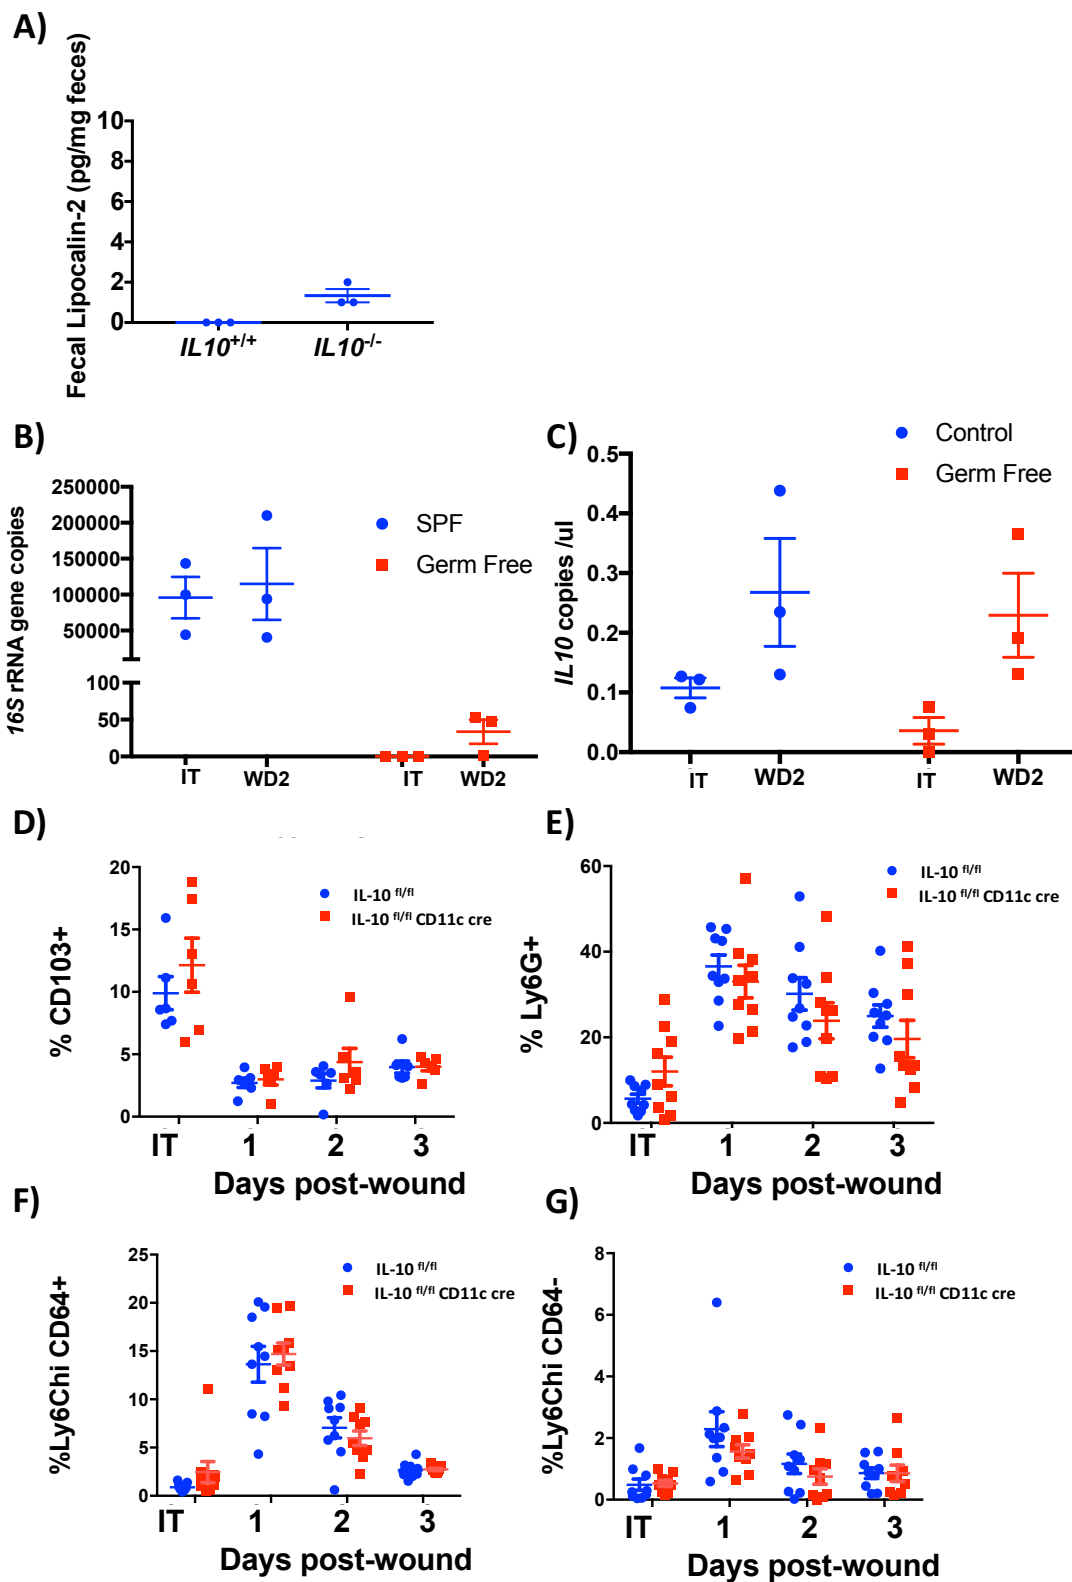

**Supplementary Figure 1.** **A)** Levels of the fecal pro-inflammatory marker lipocalin-2 in WT and IL-10 KO mice (n=3, mean ± SEM). **B)** bacterial 16S rRNA gene copies in SPF and GF WT mice. **C)** *IL10* mRNA copies/μl in intact and day 2 post-wounding tissue of SPF and GF WT mice. **D–G)** Representative plots of lamina propria myeloid cells isolated from intact and wounded tissue from IL-10<sup>fl/fl</sup> and IL-10<sup>fl/fl</sup> CD11c Cre mice and stained for CD103, Ly6G, CD56 and Ly6C (n=6-10, mean ± SEM) Statistical comparisons were performed by ANOVA with Tukey's multiple comparison post-test. IT: intact mucosa. WD: Wound day. SPF: specific pathogen free.

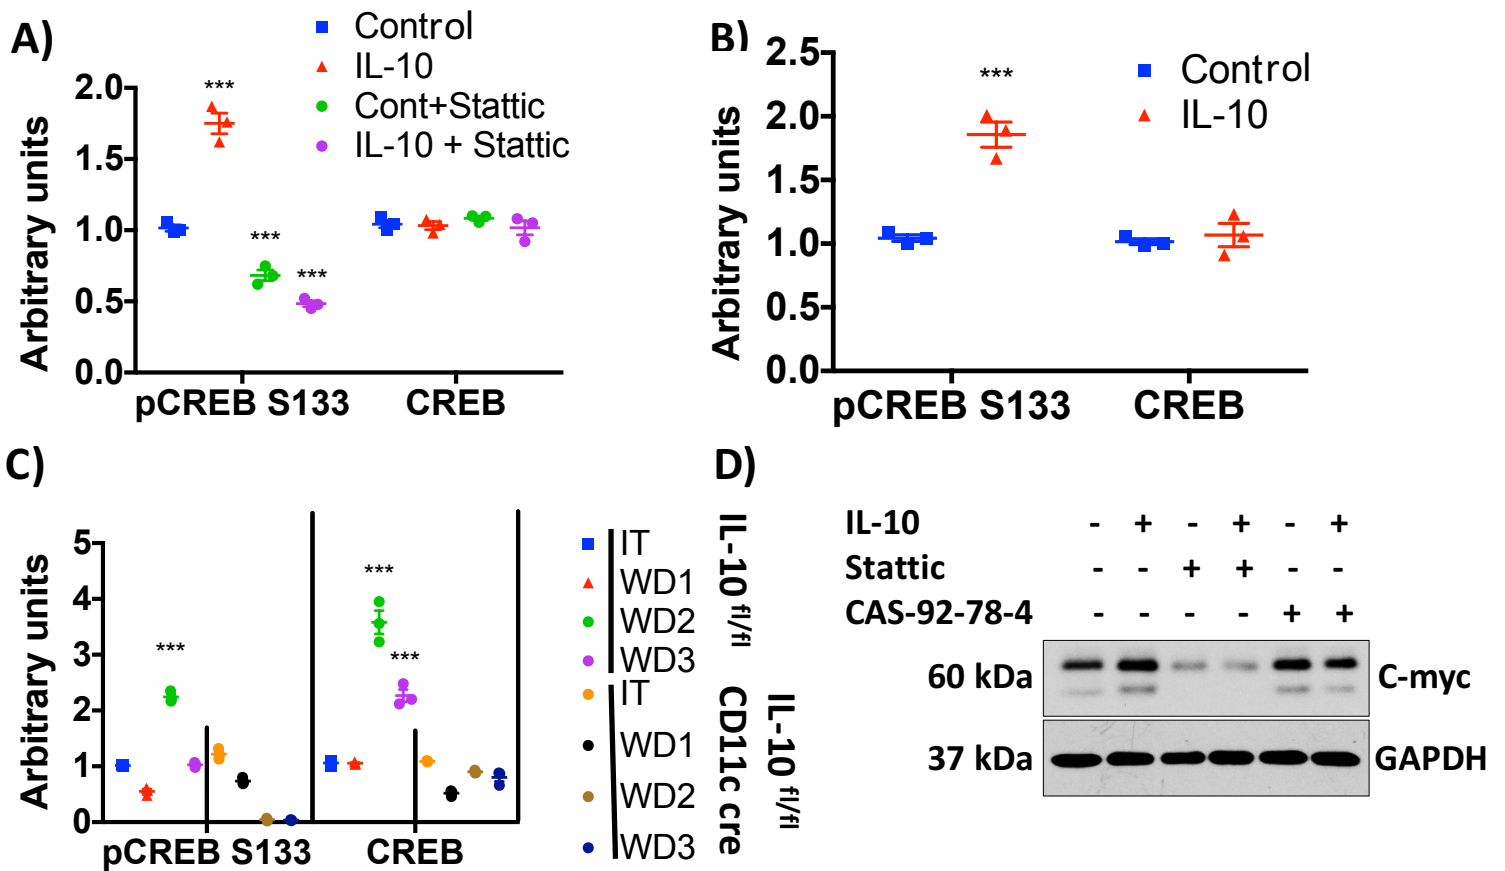

**Supplementary Figure 2. A)** Densitometry of immunoblots for CREB and activated CREB (pS133) on scratched IEC monolayers treated with rhIL-10 (100nM) and Stattic (10  $\mu$ M) for 60 min; (\*\*\*) $p < 0.001$ ,  $n = 3$ , mean  $\pm$  SEM) **B)** Human enteroids treated with IL-10 (100 nM) for 24 h; (\*\*\*) $p < 0.001$ ,  $n = 3$ , mean  $\pm$  SEM) **C)** Lysates from intact colon and wounds harvested on day 1 to 3 in IL-10<sup>fl/fl</sup> and IL-10<sup>fl/fl</sup> CD11c<sup>cre</sup> mice. (\*\*\*) $p < 0.001$ ,  $n = 3$ , mean  $\pm$  SEM) **D)** Immunoblots for c-myc and GAPDH were performed using lysates from scratch wounded intestinal epithelial cell monolayers treated with rhIL-10 (100nM), Stattic (10  $\mu$ M) and CAS-92-78-4 (10 $\mu$ M) for 4 hours. Representative image,  $n = 3$ . Statistical comparisons were performed by ANOVA with Tukey's multiple comparison post-test. IT: intact. WD: wound day.

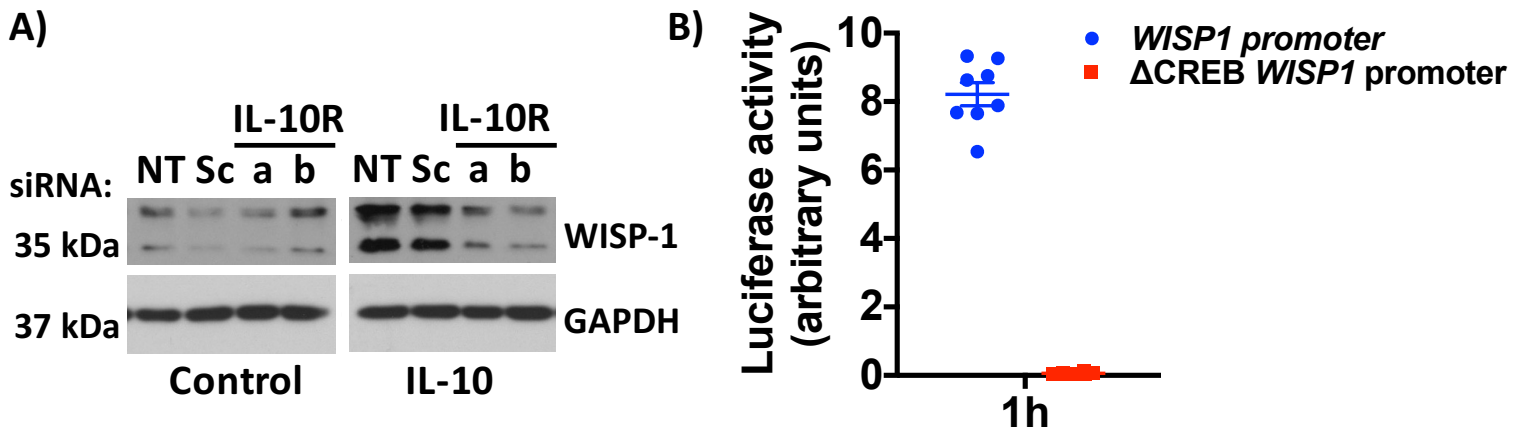

**Supplementary Figure 3. IL-10 induces WISP-1 secretion and CREB activation.** **A)** Immunoblots to detect WISP-1 and GAPDH were performed from scratch wounded intestinal epithelial monolayers treated with rhIL-10 or BSA (100nM) for 4 hours. Representative image, n=3 **B)** SKCO-15 cells transfected with a *WISP1* promoter coupled to luciferase with or without the CREB binding site were treated with forskolin for 1 hour (10  $\mu$ M) (n=8, mean  $\pm$  SEM). NT: non transfected, Scr; scramble. A: IL-10Ra siRNA; B IL-10Rb siRNA.

WISP-1/Actin/Nuclei

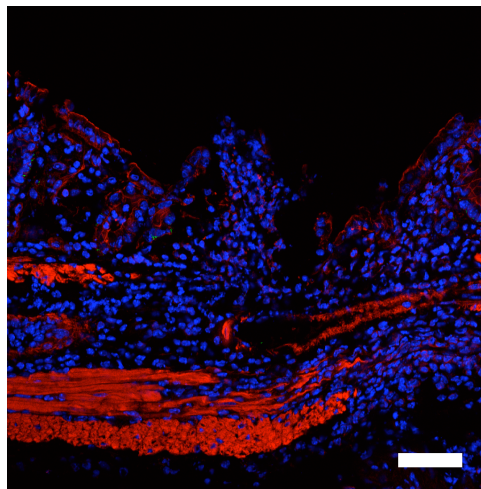

**Supplementary Figure 4.** Laser confocal micrograph of a frozen section from a colon wound. Secondary only antibody control. Alexa 488 goat anti rabbit (green), F-actin (red) and nuclei (blue). Scale bar: 100  $\mu\text{m}$ .

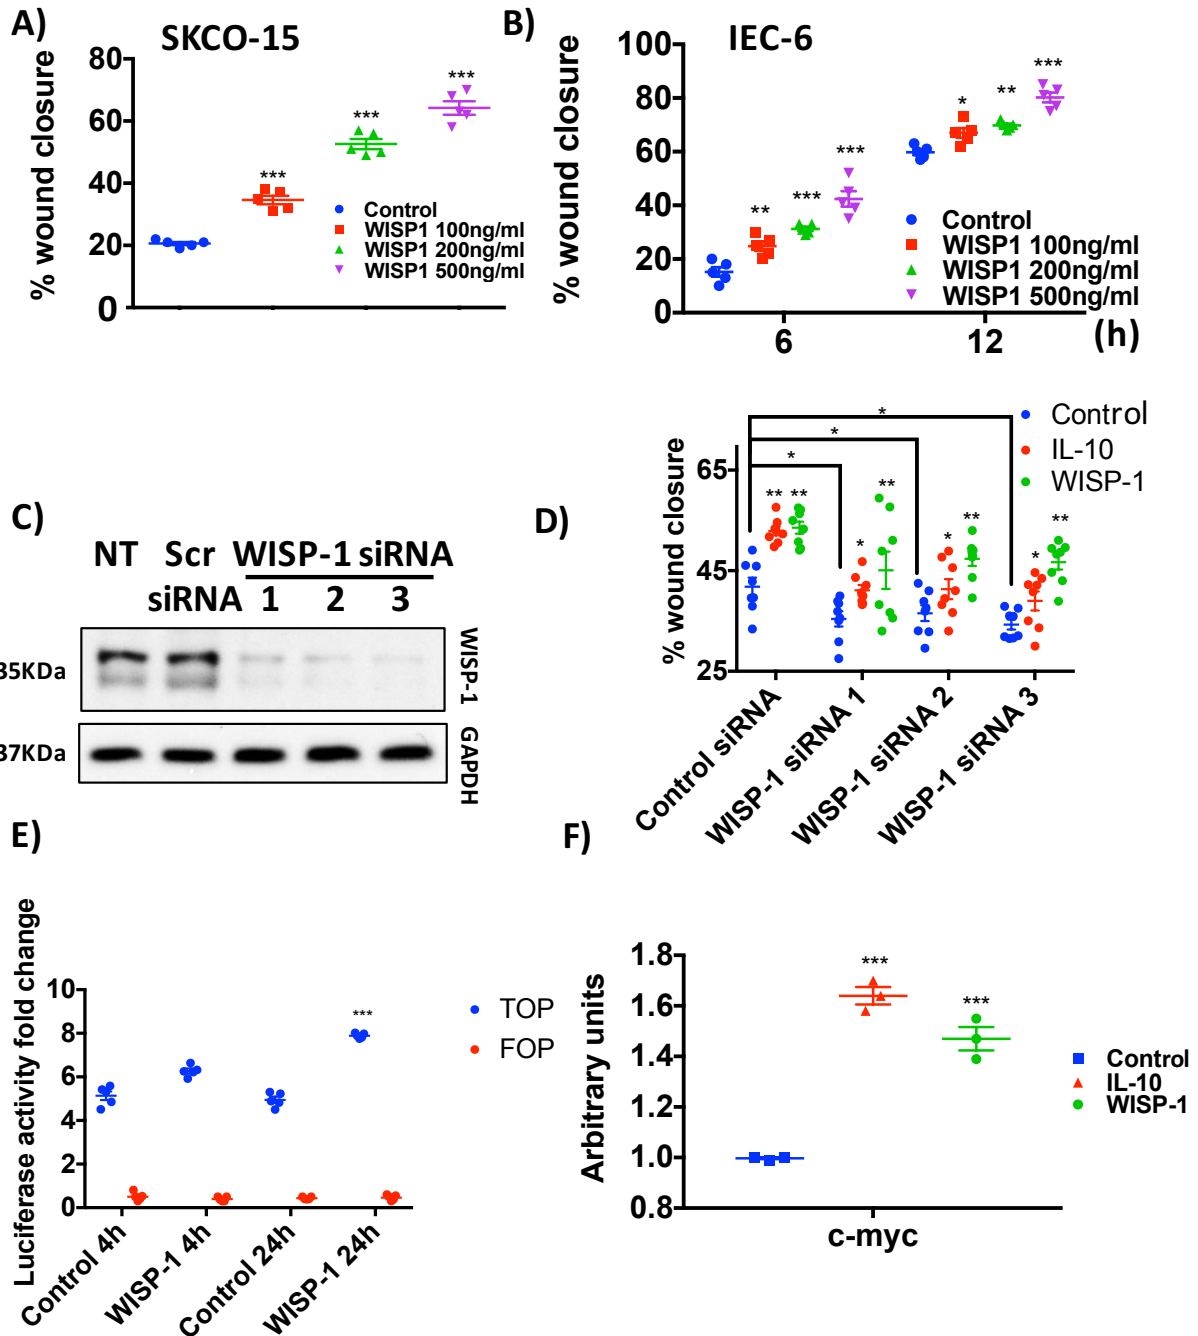

**Supplementary Figure 5.** Scratch wound healing in monolayers of SKCO-15 (A) and IEC-6 cells (B). WISP-1 was added to wounded intestinal epithelial cells and wound widths were determined at 6 and 12 (B) and 24 (A) hours post injury (\* $p < 0.05$ , \*\* $p < 0.01$ ; \*\*\* $p < 0.001$ ,  $n = 5$ , mean  $\pm$  SEM). C) Lysates from cells transfected with a control or WISP-1 targeted siRNAs were immunoblotted for WISP-1 and GAPDH as loading control. Representative image,  $n = 3$  D) Percentage of wound closure in cells after siRNA mediated down regulation of WISP-1 (WISP-1 siRNA1, 2 and 3) or scramble control siRNA (\* $p < 0.05$ , \*\* $p < 0.01$ ;  $n = 8$ , mean  $\pm$  SEM) and treated with rhIL-10 (100 nM), WISP-1 (500 nM) or BSA. E) TOP/FOP reporter luciferase assay of cells treated with WISP-1 for 4 or 24 h (\*\*\*) $p < 0.001$ ,  $n = 5$ , mean  $\pm$  SEM). F) Densitometry from scratch wound IEC monolayers treated with BSA, IL-10 (100nM) or WISP-1 (500 nM) and immunoblotted for the pro-proliferative protein c-myc and the loading control GAPDH. Densitometry shows the average of 3 experiments. Statistical comparisons were performed by ANOVA with Tukey's multiple comparison post-test. Scr: scramble.

**Supplementary table 1.** Description of human healthy and colitis colon tissue used in this manuscript.

| Sample | Age | Diagnosis          | Medication                                       | Observations | Experiment     |
|--------|-----|--------------------|--------------------------------------------------|--------------|----------------|
| 1      | 56  | healthy            | -                                                | -            | Fig 5C, 5E     |
| 2      | 24  | healthy            | -                                                | -            | Fig 5C, 5D, 5E |
| 3      | 74  | healthy            | -                                                | -            | Fig 5C, 5E     |
| 4      | 43  | healthy            | -                                                | -            | Fig 5C, 5E     |
| 5      | 51  | healthy            | -                                                | -            | Fig 5C, 5E     |
| 6      | 74  | healthy            | -                                                | -            | Fig 5E         |
| 7      | 76  | healthy            | -                                                | -            | Fig 5E         |
| 8      | 23  | Ulcerative colitis | Infliximab, Azathioprine, Mesalazine, Budesonide | Inflamed     | Fig 5C, 5D, 5E |
| 9      | 26  | Crohn's            | Cortisone                                        | Inflamed     | Fig 5C, 5E     |
| 10     | 25  | Ulcerative colitis | Mesalazine, Cortisone                            | Inflamed     | Fig 5C, 5D, 5E |
| 11     | 24  | Ulcerative colitis | Azathioprine, Mercaptopurine, Cortisone,         | Inflamed     | Fig 5C, 5D, 5E |
| 12     | 38  | Ulcerative colitis | Mesalazine, Budesonide                           | Inflamed     | Fig 5C, 5E     |
| 13     | 59  | Crohn's            | Cortisone, Infliximab                            | Inflamed     | Fig 5E         |
| 14     | 42  | Crohn's            | Azathioprine, Infliximab, Cortisone              | Inflamed     | Fig 5E         |
